# Supplementary material for: A randomized trial of a mobile health intervention to augment cardiac rehabilitation
Source: Springer Nature journal article supplement (doi:10.1038/s41746-023-00921-9), 2023-09-14

## **A Randomized Trial of a Mobile Health Intervention to Augment Cardiac Rehabilitation**

Jessica R. Golbus MD, MS,<sup>1,2</sup> Kashvi Gupta MBBS, MPH,<sup>3</sup> Rachel Stevens BS,<sup>1</sup> V.Swetha E. Jeganathan, MBBS, MRCS (Ophthal),<sup>1</sup> Evan Luff MS,<sup>1</sup> Jieru Shi MS,<sup>4</sup> Walter Dempsey PhD,<sup>4</sup> Thomas Boyden MD, MS,<sup>5</sup> Bhramar Mukherjee PhD,<sup>6</sup> Sarah Kohnstamm MD,<sup>1</sup> Vlad Taralunga BSE,<sup>7</sup> Vik Kheterpal MD,<sup>7</sup> Susan Murphy PhD,<sup>8</sup> Predrag Klasnja PhD,<sup>9</sup> Sachin Kheterpal MD, MBA,<sup>10</sup> Brahmajee K. Nallamothe MD, MPH<sup>1,2,11</sup>

1. Division of Cardiovascular Diseases, Department of Internal Medicine, University of Michigan, MI
2. Michigan Integrated Center for Health Analytics and Medical Prediction (MiCHAMP), University of Michigan, MI
3. Department of Internal Medicine, University of Missouri Kansas City, Kansas City, MO
4. Department of Biostatistics, University of Michigan School of Public Health, Ann Arbor, MI
5. Division of Cardiovascular Diseases, Department of Internal Medicine, Spectrum Health, MI.
6. School of Public Health, University of Michigan, Ann Arbor, MI, USA
7. CareEvolution, Ann Arbor, MI, USA
8. Departments of Statistics & Computer Science, Harvard University, Boston, MA, USA
9. School of Information, University of Michigan, Ann Arbor, MI, USA
10. Department of Anesthesiology, University of Michigan, MI.
11. The Center for Clinical Management and Research, Ann Arbor VA Medical Center, MI

**Table of Contents:**

- Page 3: Supplementary Tables 1-6
- Page 9: Supplementary Figures 1-2

**Supplementary Table 1: Remotely Assessed 6-minute Walk Distance and Step Count at Baseline, 3-Months, and 6-Months from Study Enrollment**

|                                       | Control |                 | Intervention |                 | P-value |
|---------------------------------------|---------|-----------------|--------------|-----------------|---------|
|                                       | N       | Mean (SD)       | N            | Mean (SD)       |         |
| <b>6-minute walk distance, meters</b> |         |                 |              |                 |         |
| Baseline                              | 101     | 492.1 (122.5)   | 101          | 510.8 (133.9)   | 0.30    |
| 3-months                              | 93      | 505.4 (135.3)   | 89           | 531.2 (137.6)   | 0.20    |
| 6-months                              | 89      | 505.9 (130.9)   | 83           | 530.3 (157.9)   | 0.27    |
| <b>Mean daily step count, steps</b>   |         |                 |              |                 |         |
| Baseline                              | 108     | 6911.4 (3190.1) | 110          | 7294.9 (3665.0) | 0.41    |
| 3-months                              | 104     | 6636.4 (3671.1) | 105          | 7652.9 (3918.2) | 0.05    |
| 6-months                              | 97      | 6976.6 (3780.9) | 98           | 7395.9 (3859.6) | 0.44    |

Student's t-test was performed to test differences in 6-minute walk distance and step count between intervention and control groups at each of the three times points.

**Supplementary Table 2: Remotely Assessed 6-Minute Walk Distance and Step Count by Smartwatch Type at Baseline, 3-Months, and 6-Months from Study Enrollment**

|                                       | Control     |                 |        |                 | Intervention |                 |        |                 |
|---------------------------------------|-------------|-----------------|--------|-----------------|--------------|-----------------|--------|-----------------|
|                                       | Apple Watch |                 | Fitbit |                 | Apple Watch  |                 | Fitbit |                 |
|                                       | N           | Mean (SD)       | N      | Mean (SD)       | N            | Mean (SD)       | N      | Mean (SD)       |
| <b>6-minute walk distance, meters</b> |             |                 |        |                 |              |                 |        |                 |
| Baseline                              | 64          | 485.6 (110.8)   | 37     | 503.4 (141.5)   | 64           | 530.7 (109.6)   | 37     | 476.5 (164.1)   |
| 3-months                              | 60          | 507.9 (107.1)   | 33     | 500.7 (177.4)   | 59           | 534.5 (130.0)   | 30     | 524.9 (153.6)   |
| 6-months                              | 59          | 496.6 (119.1)   | 30     | 524.0(152.2)    | 55           | 566.9 (121.7)   | 28     | 458.3 (194.8)   |
| <b>Mean daily step count, steps</b>   |             |                 |        |                 |              |                 |        |                 |
| Baseline                              | 68          | 6971.0 (2998.7) | 40     | 6809.9 (3529.3) | 69           | 7521.8 (3641.2) | 41     | 6913.1 (3718.2) |
| 3-months                              | 67          | 6430.5 (3223.2) | 37     | 7009.3 (4392.2) | 68           | 7625.3 (3841.2) | 37     | 7703.6 (4109.1) |
| 6-months                              | 62          | 6668.2 (3265.5) | 35     | 7522.9 (4555.4) | 62           | 7590.7 (3592.3) | 36     | 7060.3 (4314.1) |

### Supplementary Table 3: Study Inclusion and Exclusion Criteria

#### Inclusion criteria.

1. Enrolled in cardiac rehabilitation at a study site
2. Age  $\geq$  18 and  $<$  75 years
3. Owns an Android or iPhone with study supported operating software.
4. Understands English to enable informed consent, completion of study-related surveys, and compliance with study messages.
5. Enrolled in cardiac rehabilitation within the past 8-weeks based on one of the following indications and has completed at least 2 cardiac rehabilitation sessions:
  - Following percutaneous coronary intervention or coronary artery bypass grafting
  - Valve repair or replacement (either surgical or percutaneous)
  - Coronary artery disease/acute coronary syndrome not requiring revascularization

#### Exclusion Criteria:

1. Orthopedic or neurological condition limiting ability to exercise
2. Greater than mild cognitive impairment
3. Wrist too large to wear a smartwatch comfortably.
4. Enrolled in hospice care
5. Severe valvular stenosis or regurgitation
6. Unrevascularized, obstructive left main or proximal left anterior descending coronary artery disease
7. Exercise-induced ventricular tachycardia
8. Cardiac arrest within the prior 6 months
9. New York Heart Association class III or IV heart failure
10. Pulmonary arterial hypertension treated with inhaled or intravenous pulmonary hypertension-specific therapy
11. Ejection fraction  $<$ 40%
12. Unsafe for participation as determined by a clinical nurse or investigative team

**Supplementary Table 4: Reasons for Study Exclusion**

| Reasons for Study Exclusion                                                                                                                                          | N <sup>a</sup> |
|----------------------------------------------------------------------------------------------------------------------------------------------------------------------|----------------|
| 1. Age <18 or ≥ 75                                                                                                                                                   | 234            |
| 2. Not a Michigan Medicine or Spectrum Health patient with data available in the electronic medical record after January 1, 2013                                     | 5              |
| 3. Did not enroll in cardiac rehabilitation within past 8 weeks or did not complete at least 2 cardiac rehabilitation sessions based on a study-qualifying diagnosis | 198            |
| 4. Orthopedic or neurological condition limiting ability to exercise                                                                                                 | 71             |
| 5. Greater than mild cognitive impairment                                                                                                                            | 3              |
| 6. Enrolled in hospice care                                                                                                                                          | 0              |
| 7. Severe valvular stenosis or regurgitation                                                                                                                         | 8              |
| 8. Unrevascularized, obstructive left main or proximal left anterior descending coronary artery disease                                                              | 7              |
| 9. Exercise-induced ventricular tachycardia                                                                                                                          | 4              |
| 10. Cardiac arrest within the prior 6 months                                                                                                                         | 14             |
| 11. New York Heart Association class III or IV heart failure                                                                                                         | 68             |
| 12. Ejection fraction <40%                                                                                                                                           | 130            |
| 13. Pulmonary arterial hypertension treated with inhaled or intravenous pulmonary hypertension-specific therapy                                                      | 1              |
| 14. Unsafe for participation as determined by a clinical nurse or investigative team                                                                                 | 23             |
|                                                                                                                                                                      |                |
| 15. Does not own an Android or iPhone with study supported operating software                                                                                        | 13             |
| 16. Not proficient in English (to enable informed consent, completion of study-related surveys, and compliance with study messages)                                  | 21             |
| 17. Wrist too large to wear a smartwatch comfortably.                                                                                                                | 0              |

Eligibility based on the first 14 criterion initially determined using the electronic medical record. If patients were deemed potentially eligible, they were contacted by phone and their eligibility based on the final 3 criteria was assessed. <sup>a</sup>N adds to greater than 518 as participants may meet more than one exclusion criterion.

**Supplementary Table 5: Sample Activity and Exercise Planning Text Messages**

| <b>Activity Message</b>                                                                                                                                                                                              | <b>Time</b>   | <b>Day of Week</b>                        | <b>Environment</b> | <b>Duration</b>        | <b>Other</b>              |
|----------------------------------------------------------------------------------------------------------------------------------------------------------------------------------------------------------------------|---------------|-------------------------------------------|--------------------|------------------------|---------------------------|
| Quick, look at the clock! 🕒 If the hour is odd, do that many toe-touches: stand ➡ reach to the ceiling ➡ reach to your toes ➡ repeat.                                                                                | All           | Weekend or weekday                        | Indoor or Outdoor  | Maintenance Completion | Emoji                     |
| What a morning! 🌅 [NAME], how about treating yourself to some beautiful sights by taking a short walk to start your day?                                                                                             | Morning       | Weekend or weekday                        | Outdoor            | Initiation Completion  | Emoji Personalization     |
| [NAME], you have worked so hard for the past months. Your progress here [HYPERLINK] is proof. What can you do today to be consistent?                                                                                | Morning Lunch | Weekend or weekday                        | Indoor or Outdoor  | Completion             | Hyperlink Personalization |
| <b>Exercise Planning Messages</b>                                                                                                                                                                                    | <b>Season</b> | <b>Duration in Cardiac Rehabilitation</b> |                    | <b>Other</b>           |                           |
| Remember how you felt when you started cardiac rehabilitation? Challenge yourself with exercise routines that will make you proud of yourself!                                                                       | All           | Maintenance Completion                    |                    | Gain-framing           |                           |
| There are many ways to exercise while being mindful of your aches and pains. Water sports 🏊 may reduce the strain on your joints while also elevating your heart rate. ❤️                                            | All           | Maintenance Completion                    |                    | Emoji                  |                           |
| Set an exercise goal for tomorrow [NAME]. Short bursts of higher intensity exercise will help increase your heart rate. Try 3 minutes of lighter intensity exercise followed by 2 minutes of more vigorous exercise. | All           | Initiation Completion                     |                    | Personalization        |                           |

Activity messages were tailored based on weather, day of week, time of day, and duration within the study, correlating with phase in cardiac rehabilitation (ie, initiation [0-30 days], maintenance [31-120 days], completion [121-182 days] phases). Exercise planning messages were tailored based on season and duration within the study.

**Supplementary Table 6: Completed 6-Minute Walk Tests by Timepoint**

|                 | <b>Total complete</b> | <b>Completed correctly within 7-days</b> | <b>Completed correctly within 30-days</b> | <b>Excluded 6-minute walk (&lt;100 meters)</b> | <b>Reassigned 6-minute walk</b> | <b>Completed reassigned 6-minute walk within 30-days</b> |
|-----------------|-----------------------|------------------------------------------|-------------------------------------------|------------------------------------------------|---------------------------------|----------------------------------------------------------|
| <b>Baseline</b> | 219                   | 174                                      | 202                                       | 12                                             | 17                              | 13                                                       |
| <b>3-months</b> | 196                   | 139                                      | 182                                       | 9                                              | 9                               | 8                                                        |
| <b>6-months</b> | 186                   | 118                                      | 172                                       | 11                                             | 5                               | 4                                                        |

Participants were given up to 30-days to complete 6-minute walk tests after they were assigned at enrollment and at 3- and 6-months. Distances of less than 100 meters were excluded *a priori* from analysis given invalid data concerns.



**Supplementary Figure 1: Effects of the Intervention on Change in 6-Minute Walk Distance at 6-months for Important Subgroups in Apple Watch (Top) and Fitbit (Bottom) Participants**

**Treatment Effect on 6-Minute Walk Distance for Apple Watch Users**

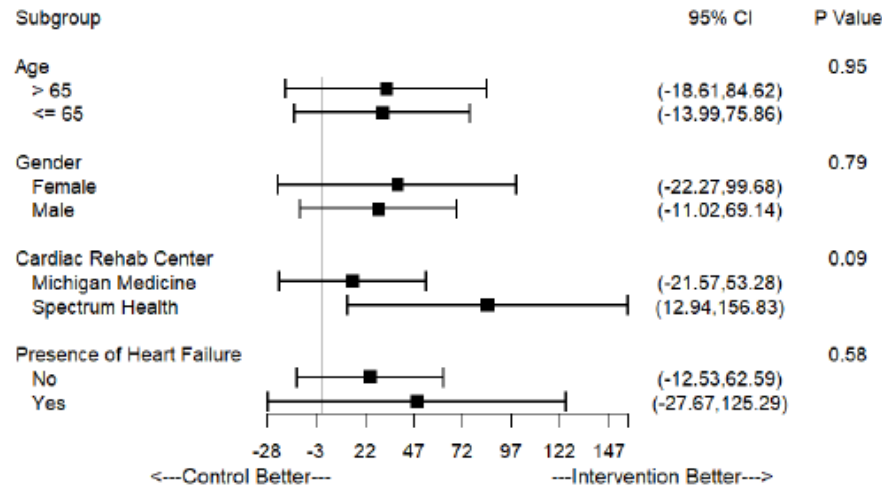

**Treatment Effect on 6-Minute Walk Distance for Fitbit Users**

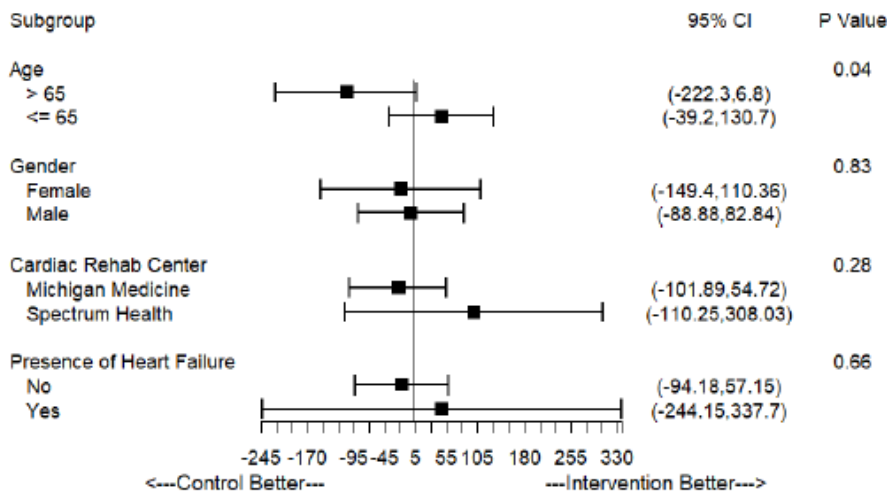

P-values for each subgroup correspond to the significance level of the interaction term between the intervention and the subgroup indicator based on linear regression analyses. Error bars refer to 95% confidence intervals.

Supplementary Figure 2: VALENTINE Mobile Application.

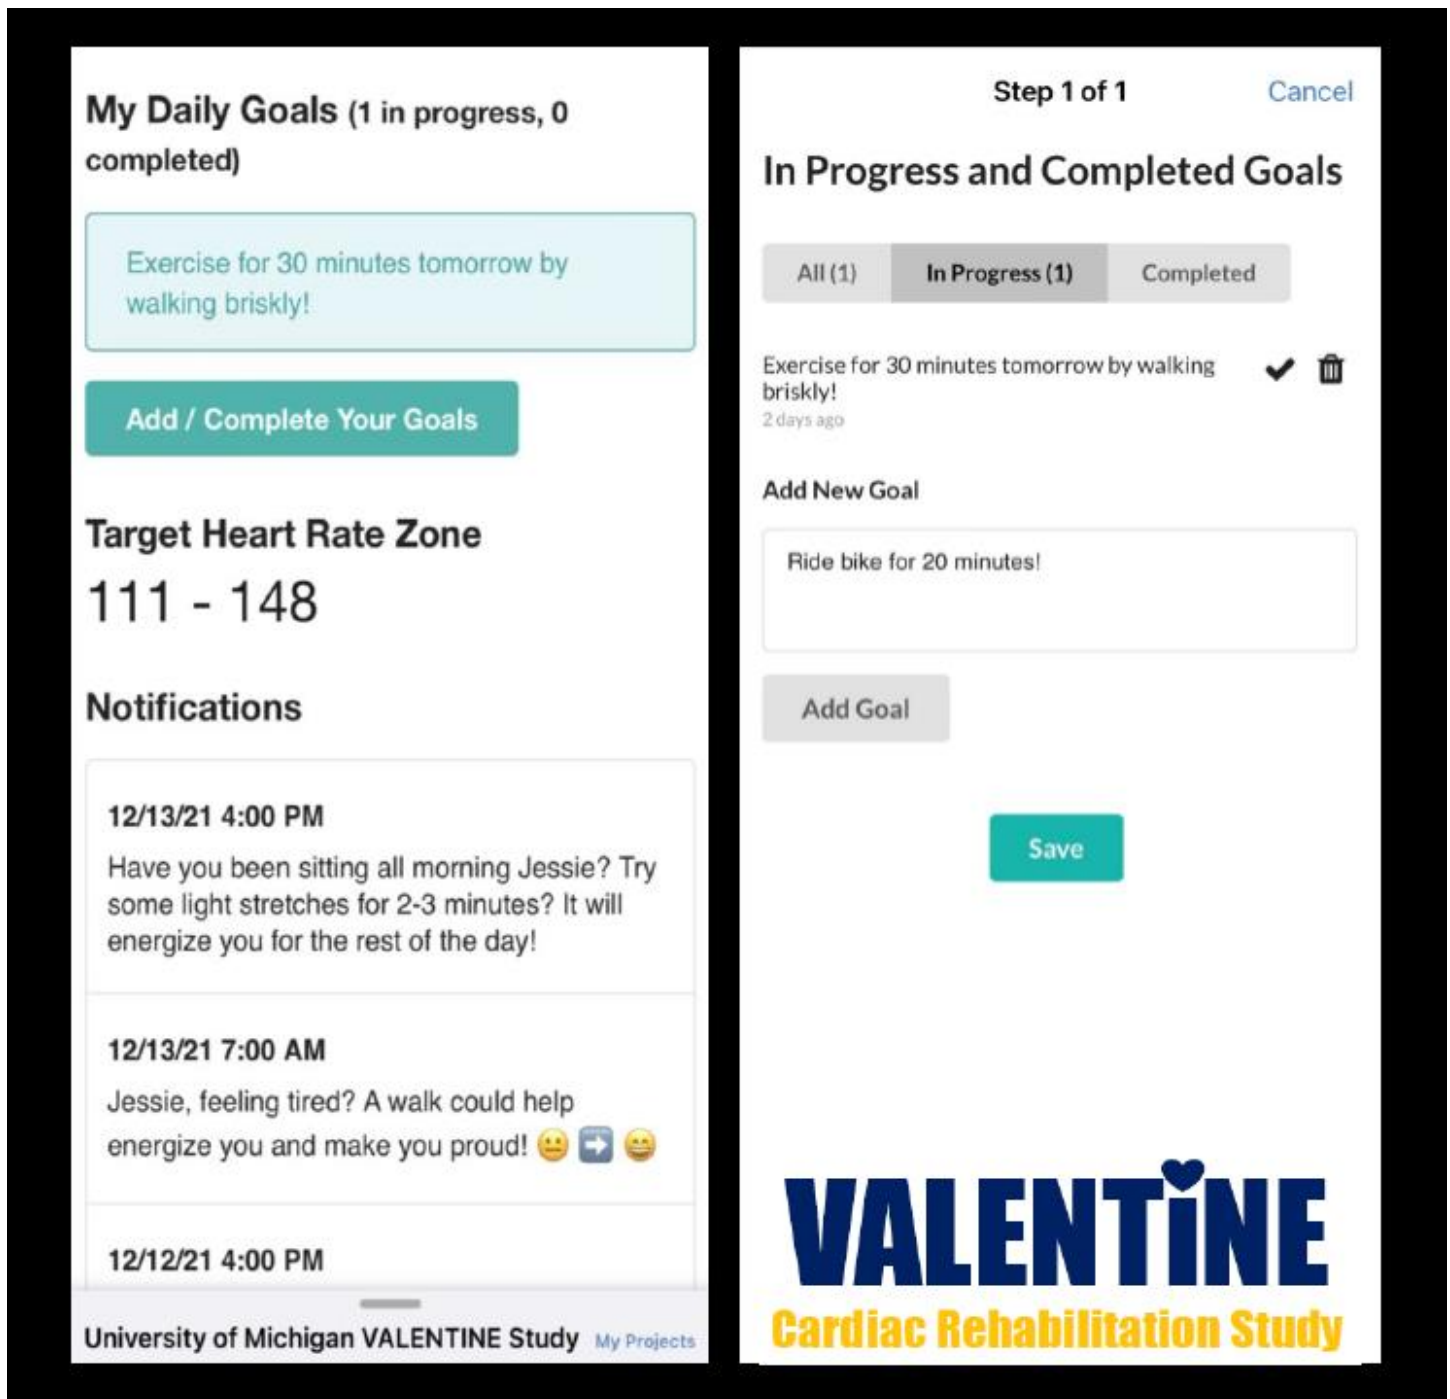

Supplement: 41746_2023_921_MOESM1_ESM.pdf [file 41746_2023_921_MOESM1_ESM.pdf]
